# Supplementary material for: Current developments in clinical sample preconcentration prior to elemental analysis by atomic spectrometry: a comprehensive literature review
Source: Royal Society of Chemistry journal article supplement (doi:10.1039/c3ja50316j), 2013-11-28
Supplement: c3ja50316j.pdf [file c3ja50316j.pdf]

Journal of Analytical Atomic Spectrometry

Supplementary materials

**Current developments in clinical sample preconcentration prior to elemental analysis  
by atomic spectrometry: A comprehensive literature review**

Tsz-Shan Lum, Yeuk-Ki Tsoi, and Kelvin Sze-Yin Leung\*

|                                |                                                                                                                        |    |
|--------------------------------|------------------------------------------------------------------------------------------------------------------------|----|
| Table 1                        | Comparison of the use of ionic liquid, nanomaterials and surfactant in metal preconcentration of clinical matrix ..... | 2  |
| Table 2                        | Examples of ionic liquid based microextraction for metal analysis in clinical samples.....                             | 3  |
| Table 3                        | Examples of nanomaterials based SPE for metal analysis in clinical samples.....                                        | 4  |
| Table 4                        | Examples of surfactant based microextraction for metal analysis in clinical samples .....                              | 5  |
| Table 5                        | Examples of automation in preconcentration for metal analysis in clinical samples .....                                | 6  |
| References for Table 1-5 ..... |                                                                                                                        | 7  |
| Figure 1                       | General configuration of flow injection manifold.....                                                                  | 9  |
| Figure 2                       | General configuration of sequential injection manifold.....                                                            | 9  |
| Abbreviation.....              |                                                                                                                        | 10 |

Unless specified as below, otherwise, the enrichment factor is calculated by the ratio of calibration curves with and without preconcentration

\*The enrichment factor is calculated by ratio of extraction volume to the sample volume

\*\*The enrichment factor is calculated by the ratio of concentration of the analyte with and without preconcentration

**Table 1** Comparison of the use of ionic liquid, nanomaterials and surfactant in metal preconcentration of clinical matrix

|                                                                                                 | Ionic liquid (extraction solvent)                                                                                                                                                                                                                                                                                                                                                                                                                             | Nanomaterials (sorbent)                                                                                                                                                                                                                                                                                                                                                                                      | Surfactant (emulsifier, sorbent modifier)                                                                                                                                                                                                                                                                                                                                                                                                                                                                                                                                         |
|-------------------------------------------------------------------------------------------------|---------------------------------------------------------------------------------------------------------------------------------------------------------------------------------------------------------------------------------------------------------------------------------------------------------------------------------------------------------------------------------------------------------------------------------------------------------------|--------------------------------------------------------------------------------------------------------------------------------------------------------------------------------------------------------------------------------------------------------------------------------------------------------------------------------------------------------------------------------------------------------------|-----------------------------------------------------------------------------------------------------------------------------------------------------------------------------------------------------------------------------------------------------------------------------------------------------------------------------------------------------------------------------------------------------------------------------------------------------------------------------------------------------------------------------------------------------------------------------------|
| Examples of materials used                                                                      | [C <sub>4</sub> MIM][PF <sub>6</sub> ], [C <sub>6</sub> MIM][PF <sub>6</sub> ], [C <sub>6</sub> MIM][BF <sub>4</sub> ]                                                                                                                                                                                                                                                                                                                                        | Modified MWCNT, modified Al <sub>2</sub> O <sub>3</sub> or SiO <sub>2</sub> , modified Fe <sub>3</sub> O <sub>4</sub> NPs                                                                                                                                                                                                                                                                                    | Triton X-114, CTAB, PONPE 7.5                                                                                                                                                                                                                                                                                                                                                                                                                                                                                                                                                     |
| Detection                                                                                       | FAAS, ETAAS, HGAAS, ICPOES, ICPMS, LC-ICPMS                                                                                                                                                                                                                                                                                                                                                                                                                   |                                                                                                                                                                                                                                                                                                                                                                                                              |                                                                                                                                                                                                                                                                                                                                                                                                                                                                                                                                                                                   |
| Preconcentration technique                                                                      | LPME, DLLME, DLME, HS-SDME, SSLME, MSPE, SPE, CPE, SPME                                                                                                                                                                                                                                                                                                                                                                                                       |                                                                                                                                                                                                                                                                                                                                                                                                              |                                                                                                                                                                                                                                                                                                                                                                                                                                                                                                                                                                                   |
| Analyte reported in literature (speciation analysis has been found for the underlined elements) | Ag, <u>As</u> , Au, Cd, Co, <u>Cr</u> , Cu, <u>Hg</u> , Pb, Pd, Tl, V, Zn                                                                                                                                                                                                                                                                                                                                                                                     | Al, As, Au, Cd, Co, <u>Cr</u> , Cu, Fe, Hg, Ir, Mn, Ni, Pb, Pd, Pt, Rh, Ru, Se, V, Zn                                                                                                                                                                                                                                                                                                                        | Ag, Al, <u>As</u> , Bi, Cd, Co, <u>Cr</u> , Cu, <u>Hg</u> , Mn, Ni, Pb, Pd, <u>Sb</u> , <u>Se</u> , Tl, Zn, REEs                                                                                                                                                                                                                                                                                                                                                                                                                                                                  |
| Matrix (in the order of descending frequency of application)                                    | Hair, urine, blood, saliva, nail, serum, tissue                                                                                                                                                                                                                                                                                                                                                                                                               | Hair, urine, tissue, plasma, serum                                                                                                                                                                                                                                                                                                                                                                           | Urine, hair, blood, tissue, serum, bone ash, plasma, nail                                                                                                                                                                                                                                                                                                                                                                                                                                                                                                                         |
| Online analysis example                                                                         | <ol style="list-style-type: none"> <li>1. FI automated LPME: the solution mixture containing the dispersed IL phase is formed upon cooling in ice bath and then extracted into the Florisil-packed microcolumn for elution<sup>1</sup></li> <li>2. SI-DLLME: online mixing of dispersive solvent, extractant (IL) and sample solution, fine droplets of analyte containing IL are trapped in the polyurethane foam for further elution<sup>2</sup></li> </ol> | Simple setup can be constructed because the SPE procedure mainly consists of sample loading and elution steps which can be performed using peristaltic pump(s) with a packed column <sup>4-9</sup>                                                                                                                                                                                                           | <ol style="list-style-type: none"> <li>1. CME (SPME): surfactant is used in the preparation of the modified capillary in SPME<sup>20</sup></li> <li>2. FI online CPE: sample solution, surfactant, and chelating agent are loaded into a microcolumn packed with filtering materials, the adsorbed surfactant with extracted analyte are then eluted by suitable eluent in the subsequent step<sup>6</sup></li> <li>3. Surfactant coated SPE: sample solution is passed through the surfactant-modified microcolumn to allow the extraction to take place<sup>20</sup></li> </ol> |
| Comment                                                                                         | <ul style="list-style-type: none"> <li>-Preferential extraction of different metal species by temperature control<sup>3</sup></li> <li>-Only small amount (in terms of µL) of ionic liquid is needed in the extraction</li> <li>-Temperature control may be applied to assist the extraction</li> </ul>                                                                                                                                                       | <ul style="list-style-type: none"> <li>-More than ten publications introduced simultaneous extraction of different metals<sup>4,5,7,10-19</sup></li> <li>-Some SPE column can be reused, this provides less variation between extractions, and more chemicals can be saved</li> <li>-Various modification can be made on the surface of nanomaterials sorbents to tune the extraction selectivity</li> </ul> | <ul style="list-style-type: none"> <li>-Reduction/oxidation prior to extraction may be required for speciation analysis<sup>21-23</sup></li> <li>-A relatively mature technique, applications have been investigated on more than twenty metals</li> <li>-Temperature control is usually applied to assist the extraction</li> </ul>                                                                                                                                                                                                                                              |

**Table 2** Examples of ionic liquid based microextraction for metal analysis in clinical samples

| Sample        | Analyte         | Technique           | Extractant/dispersant/chelating agent/others)                                                                | Detection     | LOD                          | EF            | Ref |
|---------------|-----------------|---------------------|--------------------------------------------------------------------------------------------------------------|---------------|------------------------------|---------------|-----|
| Hair, urine   | Cu, Zn, Cd      | IL-MSPE, nano       | Fe <sub>3</sub> O <sub>4</sub> @SiOH @[MTOA <sup>+</sup> ][Cl <sup>-</sup> ]                                 | ICPOES        | 0.33-0.56 µg L <sup>-1</sup> | 10*           | 10  |
| Hair          | Pb              | TC-IL-LPME          | [C <sub>4</sub> MIM][PF <sub>6</sub> ]/-/                                                                    | FAAS          | 5.8 µg L <sup>-1</sup>       | 30*           | 24  |
| Urine         | Cr(III), Cr(VI) | TC-IL-LPME          | [C <sub>6</sub> MIM][PF <sub>6</sub> ]/-/APDC/Anti-sticking agent: Triton X-114                              | ETAAS         | 2.45-5.40 ng L <sup>-1</sup> | 42**          | 3   |
| Urine         | Tl              | IL-DLLME, online    | [C <sub>6</sub> MIM][PF <sub>6</sub> ]/EtOH/-                                                                | FAAS          | 0.86 µg L <sup>-1</sup>      | 290           | 2   |
| Hair          | Pb              | IL-SSLME            | [C <sub>4</sub> MIM][PF <sub>6</sub> ]/Triton X-114/dithizone/-                                              | FAAS          | 0.281 µg L <sup>-1</sup>     | 82.6          | 25  |
| Blood         | Pb              | TC-IL-DLME          | [C <sub>4</sub> MIM][PF <sub>6</sub> ]/-/APDC/-                                                              | FAAS          | 0.13 µg L <sup>-1</sup>      | 93            | 26  |
| Hair          | Au, Ag          | IL-DLLME            | [C <sub>6</sub> MIM][PF <sub>6</sub> ]/- N-(4-{4-<br>[(anilinothioyl)amino]benzyl}phenyl)-N-phenylthiourea/- | ETAAS         | 2.6-4.8 ng L <sup>-1</sup>   | 48.3-<br>48.7 | 27  |
| Hair, nail    | As(III), As(V)  | IL-ISSFME           | [C <sub>6</sub> MIM][BF <sub>4</sub> ] with NaPF <sub>6</sub> /-/APDC/-                                      | ETAAS         | 6 ng L <sup>-1</sup>         | -             | 28  |
| Blood, urine  | As(III), As(V)  | IL-DLLME            | [C <sub>4</sub> MIM]PF <sub>6</sub> /acetone, CCl <sub>4</sub> /APDC/back extractant: HCl                    | HGAAS         | 5 ng L <sup>-1</sup>         | -             | 29  |
| Hair          | iHg, oHg        | CV-IL-HS-SDME       | CYPHOS IL 101 with KMnO <sub>4</sub> /-/reductant: SnCl <sub>2</sub>                                         | ETAAS         | 10 ng L <sup>-1</sup>        | 75            | 30  |
| Saliva        | V               | IL-FI-CIAME, online | [C <sub>4</sub> MIM][PF <sub>6</sub> ]/-5-Br-PADAP/anti-sticking agent: Triton X-100                         | ETAAS         | 4.8 ng L <sup>-1</sup>       | -             | 1   |
| Saliva, urine | Co              | IL-DLLME            | [C <sub>6</sub> MIM][PF <sub>6</sub> ]/MeOH/1N2N/anti-sticking agent: Triton X-114                           | ETAAS         | 3.8 ng L <sup>-1</sup>       | 120           | 31  |
| Serum, hair   | Co, Hg, Pb      | IL-CF-SDME          | [C <sub>4</sub> MIM][PF <sub>6</sub> ], PAN/-/- modifier: PAN                                                | ETV-<br>ICPMS | 1.5-9.8 pg mL <sup>-1</sup>  | -             | 32  |

**Table 3** Examples of nanomaterials based SPE for metal analysis in clinical samples

| Sample        | Analyte                                                | Technique               | Sorbent material, others                                                       | Detection      | LOD                          | EF            | Ref |
|---------------|--------------------------------------------------------|-------------------------|--------------------------------------------------------------------------------|----------------|------------------------------|---------------|-----|
| Plasma, urine | Al(III), Cr(III)                                       | nano-MSPE               | MPA-TEOS-MNPs (Fe <sub>3</sub> O <sub>4</sub> )                                | ETAAS,<br>FAAS | 0.09-0.19 µg L <sup>-1</sup> |               | 11  |
| Hair, urine   | Cu, Zn, Cd                                             | IL, nano-MSPE           | Fe <sub>3</sub> O <sub>4</sub> @SiOH @[MTOA <sup>+</sup> ][Cl <sup>-</sup> ]   | ICPOES         | 0.33-0.56 µg L <sup>-1</sup> | 10*           | 10  |
| Hair          | Cr(III), Cu(II), Pb(II), Zn(II)                        | nano-MSPE               | Dithizone modified silica coated Fe <sub>3</sub> O <sub>4</sub>                | ICPOES         | 8-62 ng L <sup>-1</sup>      | -             | 13  |
| Serum, urine  | Cr(III), Cr                                            | nano-MSPE               | Fe <sub>3</sub> O <sub>4</sub> @ZrO <sub>2</sub>                               | FAAS           | 0.69 µg L <sup>-1</sup>      | -             | 33  |
| Urine         | Pb(II)                                                 | nano-MSPE               | Fe <sub>3</sub> O <sub>4</sub>                                                 | ETAAS          | 0.8 ng L <sup>-1</sup>       | 200*          | 34  |
| Hair          | Pb(II), Cd(II), Cu(II)                                 | nano-MSPE               | Fe <sub>3</sub> O <sub>4</sub> /SiO <sub>2</sub> /Schiff base                  | FAAS           | 0.12-0.19 µg L <sup>-1</sup> | 87.5*         | 14  |
| Urine         | V, Co, Ni, Cu, Zn, As, Se, Cd, Pb                      | nano-MSPE               | MnFe <sub>2</sub> O <sub>4</sub> , chelating agent: APDC                       | ICPMS          | 0.01-0.7 µg L <sup>-1</sup>  | 7.4-10        | 15  |
| Urine         | Cd                                                     | nano-SPE, FI, online    | MWCNT (treated with H <sub>2</sub> SO <sub>4</sub> -KMnO <sub>4</sub> )        | ETA-AAS        | 0.01 µg L <sup>-1</sup>      | 3.4           | 6   |
| Hair          | Zn(II)                                                 | nano-SPE                | MWCNT-PAN                                                                      | FAAS           | 0.07 ng L <sup>-1</sup>      | 250*          | 35  |
| Hair, urine   | Cd(II)                                                 | nano-SPE                | γ-Al <sub>2</sub> O <sub>3</sub> modified with Schiff base                     | FAAS           | 0.14 µg L <sup>-1</sup>      | 75*           | 36  |
| Hair          | Ru, Rh, Pd, Pt, Ir, Au                                 | nano-MSPE, FI, online   | Mercapto-functionalized silica coated Magnetite Fe <sub>2</sub> O <sub>3</sub> | ICPMS          | 1.7-2.5 ng L <sup>-1</sup>   |               | 4   |
| Urine         | Pb(II), Cr(III)                                        | nano-SPE                | DNPH modified SDS coated alumina                                               | FAAS           | 0.43-0.55 µg L <sup>-1</sup> | 266.6*        | 16  |
| Hair          | Pb(II), Cd(II)                                         | nano-SPE                | MWCNT-MnO <sub>2</sub>                                                         | ETAAS          | 1.5-4.4 ng L <sup>-1</sup>   | 100*          | 19  |
| Hair, urine   | Al(III)                                                | nano-SPE                | 4-aminophenylarsonic acid modified nano-TiO <sub>2</sub> /SiO <sub>2</sub>     | ICPOES         | 0.06 µg L <sup>-1</sup>      | 150*          | 37  |
| Hair          | Cr(III), Cu(II), Ni(II), Cd(II)                        | nano                    | Salicylic acid modified, silica coated Fe <sub>3</sub> O <sub>4</sub>          | FAAS           | 0.11-0.27 µg L <sup>-1</sup> | 200*          | 38  |
| Bovine liver  | Cd(II), Co(II), Ni(II), Pb(II), Fe(II), Cu(II), Zn(II) | nano-SPE disc           | MWCNT, chelating agent: 8-Hydroxquinoline                                      | FAAS           | 1-5.2 µg L <sup>-1</sup>     | 60*           | 12  |
| Cell          | Cd, Hg, Pb                                             | nano-MSPE               | γ-MPTS modified silica coated MNPs (Fe)                                        | ETV-<br>ICPMS  | 0.72-1.12 ng L <sup>-1</sup> | 41.6-<br>48.7 | 17  |
| Hair          | Cu(II), Ni(II)                                         | nano-SPE, FI, online    | MWCNT-6His tagged protein, chelating agent: iminodiacetic acid (IDA)           | FAAS           | 0.31-0.63 µg L <sup>-1</sup> | -             | 7   |
| Urine         | Mn(II), Co(II), Cu(II), Zn(II), Pb(II)                 | nano-MSPE, lab on valve | MNPs-PAA (Fe)                                                                  | ICPMS          | 0.04-0.6 µg L <sup>-1</sup>  | -             | 5   |
| Pig liver     | Cd(II), Cu(II), Ni(II), Pb(II), Zn(II)                 | nano-SPE                | Morin-SiO <sub>2</sub>                                                         | ICPAES         | 0.091-0.2 µg L <sup>-1</sup> | 75*           | 18  |
| Hair          | Cd(II)                                                 | nano-SPE, FI, online    | MWCNT-L-cysteine                                                               | FAAS           | 0.28 µg L <sup>-1</sup>      | -             | 8   |

**Table 4** Examples of surfactant based microextraction for metal analysis in clinical samples

| Sample               | Analyte                        | Technique                     | Material (surfactant/chelating agent/others)                       | Detection    | LOD                             | EF          | Ref |
|----------------------|--------------------------------|-------------------------------|--------------------------------------------------------------------|--------------|---------------------------------|-------------|-----|
| Serum, urine         | Zn(II), Cd(II)                 | CPE                           | Triton X-114/TTDM/-                                                | FAAS         | 2-3 $\mu\text{g L}^{-1}$        | 23.89-25.60 | 39  |
| Hair, blood          | Pb                             | CPE                           | Triton X-114/dithizone/-                                           | FAAS         | 0.08 $\mu\text{g L}^{-1}$       | 53          | 40  |
| Serum                | Cr(III), total Cr              | CPE                           | Triton X-114/PAN (also acts as matrix modifier)/-                  | GFAAS        | 0.02 $\mu\text{g L}^{-1}$       | 83.5        | 21  |
| Oyster tissue,-urine | As, Bi, Cd, Pb                 | CPE                           | Triton X-114/DDTP/-                                                | ICPOES       | 0.047-0.28 $\mu\text{g L}^{-1}$ | 10-18       | 41  |
| Hair                 | As                             | CPE                           | Triton X-114/pyronine B/-                                          | ETAAS        | 0.022 $\mu\text{g L}^{-1}$      | -           | 42  |
| Blood                | Pb(II)                         | CPE                           | Triton X-114/APDC, DDTC/-                                          | FAAS         | 1.14 $\mu\text{g L}^{-1}$       | 42-56       | 43  |
| Blood                | Ag                             | CPE                           | Triton X-114/BHIS/-                                                | FAAS         | -                               | -           | 44  |
| Hair, serum          | Bi(III)                        | CPE, FI                       | Triton X-114/8-HQ/-                                                | ICPOES       | 0.12 $\mu\text{g L}^{-1}$       | 81          | 45  |
| Serum                | Mn(II)                         | CME, FI, online               | Template: CTAB, Mn(II), MPTS-silica coated capillary               | ICPMS        | 10.3 $\text{ng L}^{-1}$         | 16.7        | 46  |
| Blood                | Zn                             | CPE                           | Triton X-114/quinaldine, PAN/-                                     | FAAS         | 1.4-1.52 $\mu\text{g L}^{-1}$   | 26-30       | 47  |
| Blood                | Se(IV), total Se               | CPE                           | Triton X-114/DAB/-                                                 | ETAAS        | 0.025 $\mu\text{g L}^{-1}$      | -           | 23  |
| Pig liver            | REE                            | CPE, online                   | Triton X-114/with or without 8-HQ/-                                | ICPOES       | 41.4-448 $\text{pg mL}^{-1}$    | -           | 48  |
| Bone ash             | Cd, Co, Cr, Cu, Mn, Ni, Pb, Zn | CPE                           | Triton X-114/PAN, 5-Br-PADAP/-                                     | ICPOES       | 0.3-40 $\mu\text{g L}^{-1}$     | -           | 49  |
| Human albumin        | Al(III)                        | CPE                           | Triton X-114/PAN/-                                                 | GFAAS        | 0.06 $\text{ng mL}^{-1}$        | 34.8        | 50  |
| Blood, urine         | Cd(II), Pb(II), Pd(II), Ag(I)  | CPE                           | Triton X-114/BIES/-                                                | FAAS         | 1.4-2.8 $\text{ng mL}^{-1}$     | 39-48       | 51  |
| Hair                 | Hg(II), mHg                    | CPE                           | Triton X-114/DDTC/-                                                | LCICPMS      | 4-10 $\text{ng L}^{-1}$         | 21-42       | 52  |
| Hair                 | mHg, phHg, iHg                 | CPE                           | Triton X-114/DDTC/-                                                | LCICPMS      | 6-13 $\text{ng L}^{-1}$         | 18-57       | 53  |
| Hair                 | Cu, Cd                         | Surfactant coated SPE, online | SDS coated activated alumina/1,10-phenanthroline/-                 | FAAS         | 0.04-0.14 $\mu\text{g L}^{-1}$  | 116-175     | 20  |
| Plasma, urine        | Se(IV)                         | CPE                           | Triton X-114/o-phenylenediamine/-                                  | ETAAS        | 0.09 $\text{ng mL}^{-1}$        | 63.5        | 54  |
| Blood, liver         | Cu(II)                         | CPE                           | Triton X-114/PDBDM/-                                               | FAAS         | 0.6 $\text{ng mL}^{-1}$         | 41.1**      | 55  |
| Blood, liver         | Cu(II), Co(II), Ni(II)         | CPE                           | Triton X-114/MPKO/-                                                | FAAS         | 1.6-2.1 $\text{ng mL}^{-1}$     | 58-67       | 56  |
| Urine                | Cd                             | CPE                           | PONPE 7.5/5-Br-PADAP/-                                             | ETAAS        | 0.008 $\mu\text{g L}^{-1}$      | 22          | 57  |
| Hair, urine          | Hg                             | CPE                           | PONPE 7.5/5-Br-PADAP/-                                             | ETAAS        | 0.001-0.1 $\mu\text{g L}^{-1}$  | 22          | 58  |
| Urine                | Cd                             | CPE                           | Triton X-114/APDC/-                                                | AAS          | 5 $\text{ng L}^{-1}$            | 15*         | 59  |
| Hair                 | Al(III)                        | CPE                           | Triton X-114/PMBP/-                                                | GFAAS        | 0.09 $\text{ng mL}^{-1}$        | 37          | 60  |
| Blood, serum         | Cd, Pb, Cu, Co, Ni             | Two step CPE                  | Triton X-114/DDTC, PAR/-                                           | ICPMS        | 0.04-0.1 $\mu\text{g L}^{-1}$   | -           | 61  |
| Urine                | Tl(III)                        | Surfactant coated SPE         | Silica C18 coated with cationic surfactant: Zephyramine            | ICPMS, ETAAS | 0.24 $\mu\text{g mL}^{-1}$      | -           | 62  |
| Hair, urine          | Cd(II)                         | nano-SPE                      | $\gamma$ -Al <sub>2</sub> O <sub>3</sub> modified with Schiff base | FAAS         | 0.14 $\mu\text{g L}^{-1}$       | 75*         | 36  |
| Urine                | Pb(II), Cr(III)                | nano-SPE                      | DNPH modified SLS coated alumina                                   | FAAS         | 0.43-0.55 $\mu\text{g L}^{-1}$  | 266.7*      | 16  |

**Table 5** Examples of automation in preconcentration for metal analysis in clinical samples

| Sample               | Analyte                                | Technique                 | Materials/reagent                                                                                  | Detection | LOD                          | EF        | Ref |
|----------------------|----------------------------------------|---------------------------|----------------------------------------------------------------------------------------------------|-----------|------------------------------|-----------|-----|
| Serum, urine         | REE                                    | CME, FI                   | IDA modified poly(glycidyl methacrylatetrimethylolpropane trimethacrylate) monolithic capillary    | ICPMS     | 0.08-0.97 ng L <sup>-1</sup> | -         | 63  |
| Urine                | Tl                                     | IL-DLLME, SI              | PUF packed in microcolumn / [C <sub>6</sub> MIM][PF <sub>6</sub> ], EtOH                           | FAAS      | 0.86 µg L <sup>-1</sup>      | 290       | 2   |
| Mussel tissue, urine | Cd(II), Pd(II), Cu(II)                 | SPE, FI                   | Bond Elut ® Plexa™ PCX polymer resin                                                               | FAAS      | 0.1-1.8 µg L <sup>-1</sup>   | 90-95     | 64  |
| Hair                 | As(III), As(V)                         | SI, SPE                   | Y(OH) <sub>3</sub> precipitate layer coated cellulose fibre particles /reductant: KI-ascorbic acid | HGAAS     | 17 ng L <sup>-1</sup>        | -         | 65  |
| Hair                 | REE                                    | SPE, FI                   | Walnut shell-packed microcolumn                                                                    | ICPMS     | 2-34 pg g <sup>-1</sup>      | 79-102    | 66  |
| Serum                | Mn(II)                                 | IIP-CME, SPME, FI         | Template: CTAB, Mn(II), MPTS-silica coated capillary                                               | ICPMS     | 10.3 ng L <sup>-1</sup>      | -         | 46  |
| Urine                | Pb(II)                                 | IIP-SPE, FI               | Template: Pb(II), polyvinylimidazole-silica hybrid copolymer                                       | TS-FF-AAS | 0.75 µg L <sup>-1</sup>      | 128       | 67  |
| Urine                | Cd                                     | nano-SPE, FI              | MWCNT (treated with H <sub>2</sub> SO <sub>4</sub> -KMnO <sub>4</sub> )                            | ETA-AAS   | 0.01 µg L <sup>-1</sup>      | 3.4       | 6   |
| Hair                 | Ru, Rh, Pd, Pt, Ir, Au                 | nano-MSPE, FI (DSPE)      | Mercapto-functionalized silica coated Magnetite Fe <sub>2</sub> O <sub>3</sub>                     | ICPMS     | 1.7-2.5 ng L <sup>-1</sup>   | -         | 4   |
| Pig liver            | REE                                    | CPE, FI                   | Silica gel packed microcolumn /Triton X-114, 8-HQ                                                  | ICPOES    | 41.4-448 pg mL <sup>-1</sup> | -         | 53  |
| Saliva               | V                                      | IL-FI-CIAME               | [C <sub>4</sub> MIM][PF <sub>6</sub> ], 5-Br-PADAP, Triton X-100                                   | ETAAS     | 4.8 ng L <sup>-1</sup>       | -         | 1   |
| Hair                 | Cu(II), Ni(II)                         | nano-SPE, FI              | MWCNT-6His tagged protein, chelating agent: iminodiacetic acid (IDA)                               | FAAS      | 0.31-0.63 µg L <sup>-1</sup> | -         | 7   |
| Urine                | Mn(II), Co(II), Cu(II), Zn(II), Pb(II) | nano-MSPE, lab on valve   | MNPs-PAA (Fe)                                                                                      | ICPMS     | 0.04-0.6 µg L <sup>-1</sup>  | -         | 5   |
| Hair                 | Cu, Cd                                 | surfactant coated SPE, FI | SDS coated activated alumina /1,10-phenanthroline                                                  | FAAS      | 0.04-0.14 µg L <sup>-1</sup> | 116-175   | 20  |
| Urine                | Cu, Fe, Mn, Ni                         | UAD-SPE, FI               | Imminodiacetic functional group resin, Chelate Che                                                 | FAAS      | 0.5-1.1 µg L <sup>-1</sup>   | 21.3-44.1 | 68  |
| Urine                | V(V), V(IV)                            | SPE, FI                   | L-methionine immobilised on controlled pore glass (CPG)                                            | ICPOES    | 0.008 ng mL <sup>-1</sup>    | -         | 69  |
| Hair                 | Cd(II)                                 | nano-SPE, FI              | MWCNT-L-cysteine                                                                                   | FAAS      | 0.28 µg L <sup>-1</sup>      | -         | 8   |
| Hair, saliva, urine  | Al                                     | SPE, FI                   | L-methionine immobilized on controlled pore glass (CPG)                                            | ICPOES    | 25 ng L <sup>-1</sup>        | -         | 70  |

## References for Table 1-5

1. P. Berton, E. M. Martinis and R. G. Wuilloud, *J. Hazard. Mater.*, 2010, **176**, 721.
2. A. N. Anthemidis and K.-I. G. Ioannou, *Anal. Bioanal. Chem.*, 2012, **404**, 685.
3. S. Sadeghi and A. Z. Moghaddam, *Talanta*, 2012, **99**, 758.
4. Y. Li, Y.-F. Huang, Y. Jiang, B.-I. Tian, F. Han, X.-P. Yan, *Anal. Chim. Acta*, 2011, **692**, 42.
5. P.-L. Lee, Y.-C. Sun and Y.-C. Ling, *J. Anal. At. Spectrom.*, 2009, **24**, 320.
6. J. Á. Méndez, J. B. García, R. M. P. Crecente, S. G. Martín and C. H. Latorre, *Talanta*, 2011, **85**, 2361.
7. Y. Liu, Y. Li, Z.-Q. Wu, X.-P. Yan, *Talanta*, 2009, **79**, 1464.
8. Y. Liu, Y. Li and X.-P. Yan, *Adv. Funct. Mater.*, 2008, **18**, 1536.
9. S. Chen, M. Xiao, D. Lu and X. Zhan, *Rapid Commun. Mass Spectrom.*, 2007, **21**, 2524.
10. C. Cui, B. Hu, B. Chen and M. He, *J. Anal. At. Spectrom.*, 2013, **28**, 1110.
11. M. H. Mashhadizadeh and M. Amoli-Diva, *J. Anal. At. Spectrom.*, 2013, **28**, 251.
12. M. Soylak and Y. E. Unsal, *J. AOAC Int.*, 2011, **94**, 1297.
13. G. Cheng, M. He, H. Peng and B. Hu, *Talanta*, 2012, **88**, 507.
14. H. Bagheri, A. Afkhami, M. Saber-Tehrani and, H. Khoshshafar, *Talanta*, 2012, **97**, 87.
15. V. Stefanova, D. Georgieva, V. Kmetov, I. Roman and A. Canals, *J. Anal. At. Spectrom.*, 2012, **27**, 1743.
16. A. Afkhami, M. Saber-Tehrani, H. Bagheri and T. Madrakian, *Microchim. Acta*, 2011, **172**, 125.
17. B. Chen, S. Heng, H. Peng, B. Hu, X. Yu, Z. Zhang, D. Pang, X. Yue and Y. Zhu, *J. Anal. At. Spectrom.*, 2010, **25**, 1931.
18. X. Zou, Y. Cui, X. Zhu, Z. Hu and X. Chang, *J. Sol-Gel Sci. Technol.*, 2009, **50**, 35.
19. B. Yang, Q. Gong, L. Zhao, H. Sun, N. Ren, J. Qin, J. Xu and H. Yang, *Desalination*, 2011, **278**, 65.
20. A. M. H. Shabani, S. Dadfarnia and Z. Dehghani, *Talanta*, 2009, **79**, 1066.
21. M. Sun and Q. Wu, *J. Pharm. Biomed. Anal.*, 2012, **60**, 14.
22. M. Amjadi, J. L. Manzoori and Z. Taleb, *Microchim. Acta*, 2010, **169**, 187.
23. S. Sounderajan, G. K. Kumar and A.C. Udas, *J. Hazard. Mater.*, 2010, **175**, 666.
24. Z. A. Alothman, E. Yilmaz, M. Habila, A. Shabaka and M. Soylak, *Microchim. Acta*, 2013, **180**, 669.
25. F. Shah, M. Soylak, T. G. Kazi and H. I. Afridi, *J. Anal. At. Spectrom.*, 2012, **27**, 1960.
26. F. Shah, T. G. Kazi, Naeemullah, H. I. Afridi and M. Soylak, *Microchem. J.*, 2012, **101**, 5.
27. H. Ashkenani and M. A. Taher, *Microchem. J.*, 2012, **103**, 185.
28. B. Majidi and F. Shemirani, *Biol. Trace Elem. Res.*, 2011, **143**, 579.
29. H. Shir Khanloo, A. Rouhollahi and H. Z. Mousavi, *Bull. Korean Chem. Soc.*, 2011, Vol. **32**, 3923.
30. E. M. Martinis and R. G. Wuilloud, *J. Anal. At. Spectrom.*, 2010, **25**, 1432.
31. P. Berton and R. G. Wuilloud, *Anal. Chim. Acta*, 2010, **662**, 155.
32. L. Xia, X. Li, Y. Wu, B. Hu and R. Chen, *Spectrochim. Acta, Part B*, 2008, **63**, 1290.
33. Y.-W. Wu, J. Zhang, J.-F. Liu, L. Chen, Z.-L. Deng, M.-X. Han, X.-S. Wei, A.-M. Yu and H.-L. Zhang, *Appl. Surf. Sci.*, 2012, **258**, 6772.
34. S. Z. Mohammadi, T. Shamspur, M. A. Karimi and E. Naroui, *The Scientific World Journal*, 2012, Article ID 640437
35. S. Tajik, M. A. Taher, *Desalination*, 2011, **278**, 57.
36. A. Afkhami, T. Madrakian, R. Ahmadi, H. Bagheri and M. Tabatabaee, *Microchim. Acta*, 2011, **175**, 69.
37. H. Zheng, X. Gao, L. Song, H. Guo, S. Yang and X. Chang, *Microchim. Acta*, 2011, **175**, 225.
38. M R. Shishehbore, A. Afkhami and H. Bagheri, *Chemistry Central Journal*, 2011, **5**, 41.
39. A. Shokrollahi, S. Joybar, H. E. Haghghi, K. Niknam and E. Niknam, *Quim. Nova*, 2013, **36**, 368.

40. F. Shah, T. G. Kazi, N. Ullah and H. I. Afridi, *Biol. Trace Elem. Res.*, 2013, **153**, 134.
41. F. dos Santos Depoi, T. C. de Oliveira, D. P. e de Moraes and D. Pozebon, *Anal. Methods*, 2012, **4**, 89.
42. J. a. Baig, T. g. Kazi, M. B. Arain, H. I. Afridi and K. P. Mahar, *J. AOAC Int.*, 2012, **95**, 1755.
43. F. Shah, T. G. Kazi, H. I. Afridi, Naemullah, M. B. Arain and J. A. Baig, *J. Hazard. Mater.*, 2011, **192**, 1132.
44. F. Ahmadi, K. Niknam, E. Niknam, S. Delavari and A. Khanmohammadi, *E-Journal of Chemistry*, 2011, **8**, 435.
45. M. Sun and Q. Wu, *J. Hazard. Mater.*, 2011, **192**, 935.
46. F. Zheng, N. Zhang and B. Hu, *J. Anal. At. Spectrom.*, 2011, **26**, 1521.
47. N.F. Kolachi, T.G. Kazi, S. Khan, S.K. Wadhwa, J.A. Baig, H.I. Afridi, A.Q. Shah and F. Shah, *Food Chem. Toxicol.*, 2011, **49**, 2548.
48. Y. Li and B. Hu, *J. Hazard. Mater.*, 2010, **174**, 534.
49. J. Borkowska-Burnecka, A. Szymczycha-Madeja and W. Zyrnicki, *J. Hazard. Mater.*, 2010, **182**, 477.
50. M. Sun and Q. Wu, *J. Hazard. Mater.*, 2010, **176**, 901.
51. M. Ghaedia, A. Shokrollahi, K. Niknam, E. Niknam, A. Najibi and M. Soylak, *J. Hazard. Mater.*, 2009, **168**, 1022.
52. H. Chen, J. Chen, X. Jin and D. Wei, *J. Hazard. Mater.*, 2009, **172**, 1282.
53. J. Chen, H. Chen, X. Jin and H. Chen, *Talanta*, 2009, **77**, 1381.
54. M. Ghambariana, Y. Yamini, A. Saleh, S. Shariati and Najmeh Yazdanfar, *Talanta*, 2009, **78**, 970.
55. A. Shokrollahi, M. Ghaedi, O. Hossaini, N. Khanjaria and M. Soylak, *J. Hazard. Mater.*, 2008, **160**, 435.
56. M. Ghaedia, A. Shokrollahi, F. Ahmadi, H.R. Rajabi and M. Soylak, *J. Hazard. Mater.*, 2008, **150**, 533.
57. P. R. Aranda, R. A. Gil, S. Moyano, I. De Vito and L. D. Martinez, *Talanta*, 2008, **77**, 663.
58. P. R. Aranda, R. A. Gil, S. Moyano, I. E. De Vito and L. D. Martinez, *Talanta*, 2008, **75**, 307.
59. G. L. Donatia, K. E. Pharr, C. P. Calloway Jr., J. A. N'obrega and B. T. Jones, *Talanta*, 2008, **76**, 1252.
60. H. Sang, P. Liang and D. Du, *J. Hazard. Mater.*, 2008, **154**, 1127.
61. M.F. Giné, A. F. Patreze, E. L. Silva, J. E. S. Sarkis and M. H. Kakazu, *J. Braz. Chem. Soc.*, 2008, **19**, 471.
62. K. Urbánková and L. Sommer, *Microchim. Acta*, 2008, **162**, 127.
63. L. Zhang, B. Chen, M. He and Bin Hu, *J. Sep. Sci.*, 2013, **36**, 2158.
64. A. N. Anthemidis, S. Xidia and G. Giakissikli, *Talanta*, 2012, **97**, 181.
65. M.-I. An, X. Zhang, T. Yang, M. Chen and J. Wang, *Chin. J. Chem.*, 2012, **30**, 2225
66. Y. Li, J.-l. Yang and Y. Jiang, *J. Agric. Food Chem.*, 2012, **60**, 3033.
67. C. R. T. Tarley, F. N. Andrade, F. M. de Oliveirac, M. Z. Corazza, L. F. M. de Azevedo and M. G. Segatelli, *Anal. Chim. Acta*, 2011, **703**, 145.
68. R. M. Cespón-Romero and M.C. Yebra-Biurrun, *Anal. Chim. Acta*, 2008, **609**, 184.
69. P. H. Pacheco, R. A. Olsina, P. Smichowski and L. D. Martinez, *Talanta*, 2008, **74**, 593.
70. P. H. Pacheco, R. A. Gil, P. Smichowski, G. Polla and L. D. Martinez, *Microchem. J.*, 2008, **89**, 1



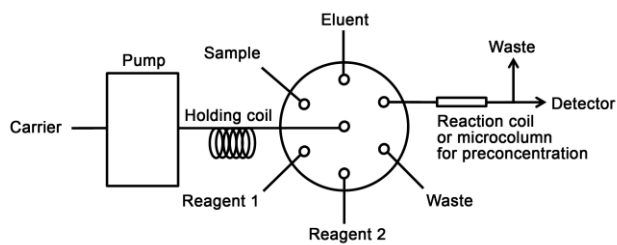

**Figure 1** General configuration of flow injection manifold.

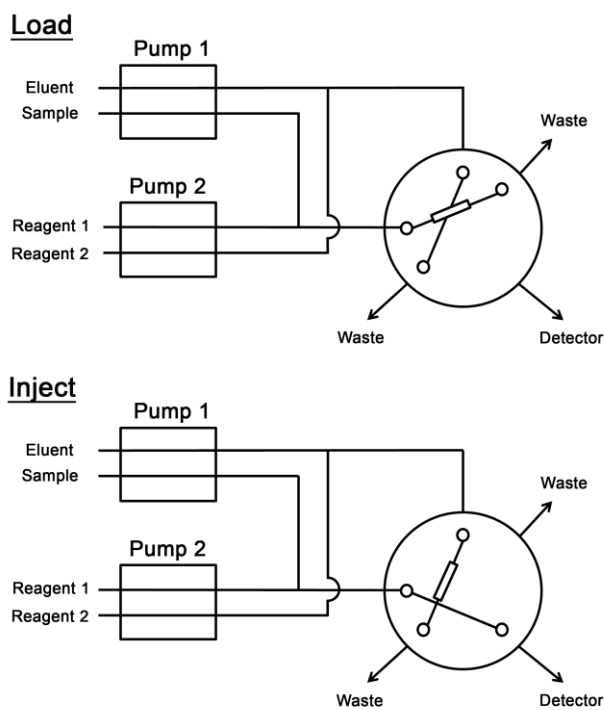

**Figure 2** General configuration of sequential injection manifold.

## Abbreviation

|                                        |                                                                        |
|----------------------------------------|------------------------------------------------------------------------|
| [C <sub>4</sub> MIM][PF <sub>6</sub> ] | 1-Butyl-3-methylimidazolium hexafluorophosphate                        |
| [C <sub>6</sub> MIM][PF <sub>6</sub> ] | 1-Hexyl-3-methylimidazolium hexafluorophosphate                        |
| [C <sub>4</sub> MIM][BF <sub>4</sub> ] | 1-Butyl-3-methylimidazolium tetrafluoroborate                          |
| [MTOA <sup>+</sup> ][Cl <sup>-</sup> ] | Methyltrioctylammonium chloride                                        |
| 1N2N                                   | 1-Nitroso-2-naphtol                                                    |
| 5-Br-PADAP                             | 2-(5-Bromo-2-pyridylazo)-5-diethyl-aminophenol                         |
| 8-HQ                                   | 8-Hydroxyquinoline                                                     |
| γ -Al <sub>2</sub> O <sub>3</sub>      | Sodium dodecyl sulfate (SDS) coated alumina nanoparticles              |
| APDC                                   | Ammonium pyrrolidinedithiocarbamate                                    |
| BHIS                                   | Bis((1H-benzo[d]imidazol-2yl)methyl) sulfane                           |
| BIES                                   | Bis((1H-benzo[d]imidazol-2yl)ethyl) sulfane                            |
| CF                                     | Cycle flow                                                             |
| CIAME                                  | Cold-induced aggregation microextraction                               |
| CME                                    | Capillary microextraction                                              |
| CPE                                    | Cloud point extraction                                                 |
| CPG                                    | Controlled pore glass                                                  |
| CTAB                                   | Cetyltrimethylammonium bromide                                         |
| CV-ILAHS-SDME                          | Cold vapor ionic liquid-assisted headspace single drop microextraction |
| CYPHOS® IL 101                         | Tetradecyl(trihexyl)phosphonium chloride                               |
| DAB                                    | Diaminobenzidine                                                       |
| DDTP                                   | Diethyldithiophosphate                                                 |
| DLLME                                  | Dispersive liquid-liquid microextraction                               |
| DLME                                   | Dispersive liquid phase microextraction                                |
| DNPB                                   | 2,4-Dinitrophenylhydrazin                                              |
| DSPE                                   | Displacement solid phase extraction                                    |
| EF                                     | Enrichment factor                                                      |
| ETA-AAS                                | Electrothermal atomization atomic absorption spectroscopy              |
| ETAAS                                  | Electrothermal atomic absorption spectroscopy                          |
| ETV                                    | Electrothermal vaporization                                            |
| FAAS                                   | Flame atomic absorption spectroscopy                                   |
| FI                                     | Flow injection                                                         |
| GFAAS                                  | Graphite furnace atomic absorption spectroscopy                        |
| HF-LPME                                | Hollow fiber based-liquid phase microextraction                        |
| HGAAS                                  | Hydride generation atomic absorption spectroscopy                      |
| HGAFS                                  | Hydride generation atomic fluorescence spectroscopy                    |
| HS                                     | Head space                                                             |
| ICPAES                                 | Inductively coupled plasma atomic emission spectrometry                |
| ICPOES                                 | Inductively coupled plasma optical emission spectroscopy               |
| ICPMS                                  | Inductively coupled plasma mass spectrometry                           |
| IDA                                    | Iminodiacetic acid                                                     |
| IIP                                    | Ion-imprinted polymer                                                  |
| IL                                     | Ionic liquid                                                           |
| ISSFME                                 | In situ solvent formation microextraction                              |
| LC-ICPMS                               | Liquid chromatography-inductively coupled plasma mass spectrometry     |
| LOD                                    | Limit of detection                                                     |
| LPME                                   | Liquid phase microextraction                                           |
| MNPs                                   | Magnetic nanoparticles                                                 |
| MPKO                                   | Methyl-2-pyridylketone oxime                                           |
| MPTS                                   | 3-Mercaptopropyl-trimethoxysilane                                      |
| MSPE                                   | Magnetic solid phase extraction                                        |
| MWCNT                                  | Multi-walled carbon nanotube                                           |
| NPs                                    | Nanoparticles                                                          |
| PAA                                    | Polyacrylic acid                                                       |
| PAN                                    | 1-(2-Pyridylazo)-2-naphtol                                             |

|              |                                                                             |
|--------------|-----------------------------------------------------------------------------|
| PAR          | 4-(2-Pyridylazo)resorcinol                                                  |
| PDBDM        | 4-(Phenyl diazenyl) benzene-1,3-diamine                                     |
| PMBP         | 1-Phenyl-3-methyl-4-benzoyl-5-pyrazolone                                    |
| PONPE 7.5    | Polyethyleneglicolmono- <i>p</i> -nonyphenylether                           |
| PUF          | Polyurethane foam                                                           |
| REEs         | Rare earth elements                                                         |
| SDME         | Solid phase microextraction                                                 |
| SI           | Sequential injection                                                        |
| SPE          | Solid phase extraction                                                      |
| SPME         | Solid phase microextraction                                                 |
| SSLME        | Single step in-syringe system for ionic liquid based liquid microextraction |
| TC           | Temperature controlled                                                      |
| TEOS         | Tetraethylorthosilicate                                                     |
| Triton X-100 | 4-(1,1,3,3-Tetramethylbutyl)phenyl-polyethylene glycol                      |
| Triton X-114 | (1,1,3,3-Tetramethylbutyl)phenyl-polyethylene glycol                        |
| TS-FF-AAS    | Flow-injection thermospray flame furnace atomic absorption spectrometry     |
| TTDM         | 3,3',3'',3'''-Tetraindolyl (terephthaloyl) dimethane                        |
| UAD          | Ultrasound-assisted digestion                                               |
